# Supplementary material for: Intermediate (S = 1) spin state in five-coordinate cobalt(iii): Magnetic properties of N-o-hydroxy-benzamido-meso-tetraphenylporphyrin cobalt(iii), Co(N-NCO(o-O)C6H4-tpp)
Source: Royal Society of Chemistry journal article supplement (doi:10.1039/b919686b), 2010-01-01
Supplement: b919686b.pdf [file b919686b.pdf]

**Electronic supplementary information (ESI)**

**(8 pages)**

**Intermediate (S=1) spin state in five-coordinate cobalt(III) : Magnetic properties of N-*o*-hydroxy-benzamido-*meso*-tetraphenylporphyrin cobalt(III), Co(N-NCO(*o*-O)C<sub>6</sub>H<sub>4</sub>-tpp)**

**Cheng-Hsiung Cho,<sup>a</sup> Ting-Yuan Chien,<sup>a</sup> Jyh-Horung Chen,<sup>\*,a</sup> Shin-Shin Wang<sup>b</sup> and Jo-Yu Tung<sup>c</sup>**

<sup>a</sup>*Department of Chemistry, National Chung Hsing University, Taichung 40227, Taiwan,*

<sup>b</sup>*Material Chemical Laboratories ITRI, Hsin-Chu 300, Taiwan,*

<sup>c</sup>*Department of Occupational Safety and Health, Chung Hwai University of Medical Technology, Taiwan*

## Contents

1. **Figure S1.**  $^1\text{H}$  NMR spectra for **3** at 599.95 MHz in  $\text{CDCl}_3$
2. **Figure S2.** Molecular configuration and atom-labeling scheme for (a) **1** and (b)  $\text{Co}(\text{N-NCO}((o\text{-O})\text{C}_6\text{H}_4\text{-tpp}))$  (**2**) and (c)  $[\text{Ga}(\text{N-NCO}(o\text{-O})\text{C}_6\text{H}_4\text{-tpp}) \cdot 0.5\text{CHCl}_3 \cdot \text{MeOH}; \mathbf{3} \cdot 0.5\text{CHCl}_3 \cdot \text{MeOH}]$
3. **Figure S3.**  $^1\text{H}$  NMR spectra for **2** at 599.95 MHz at  $20^\circ\text{C}$  in  $\text{CDCl}_3$
4. **Figure S4.** Diagram of the porphyrinato core ( $\text{C}_{20}\text{N}_4$ , M, and BA) of (a) compound **2** and (b) compound **3**.

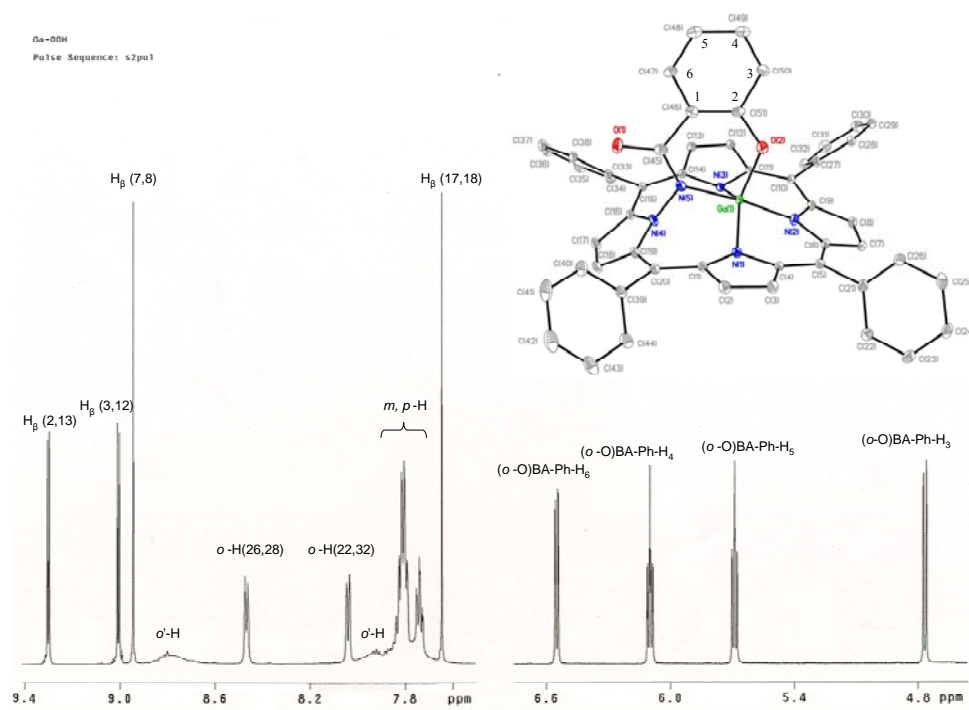

Figure S1(a) 20°C

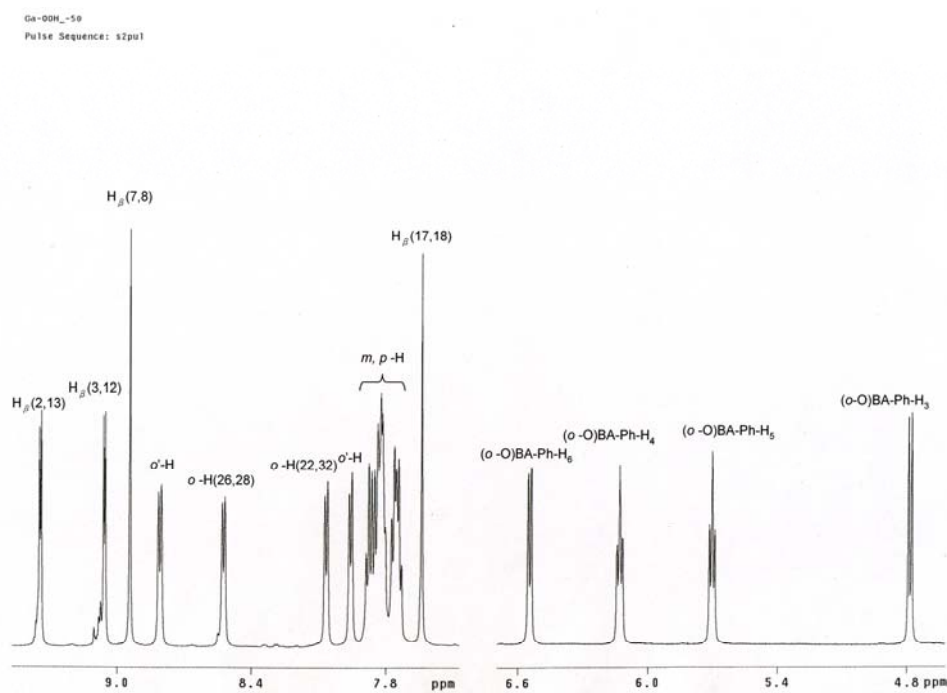

Figure S1(b) -50°C

**Figure S1.**  $^1\text{H}$  NMR spectra for **3** at 599.95 MHz in  $\text{CDCl}_3$  showing four different  $\beta$ -pyrrole protons  $\text{H}_\beta$ , phenyl protons ( $\sigma\text{-H}$ ,  $m, p\text{-H}$ ) and ( $\sigma\text{-O}$ )BA-Ph protons: (a) 20°C and (b) -50°C.

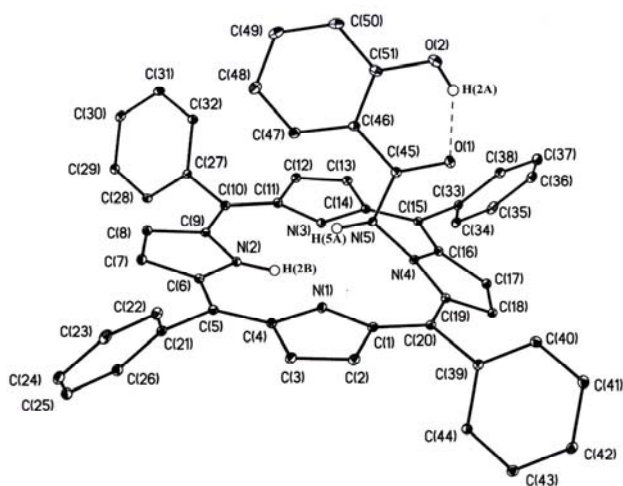

(a) 1

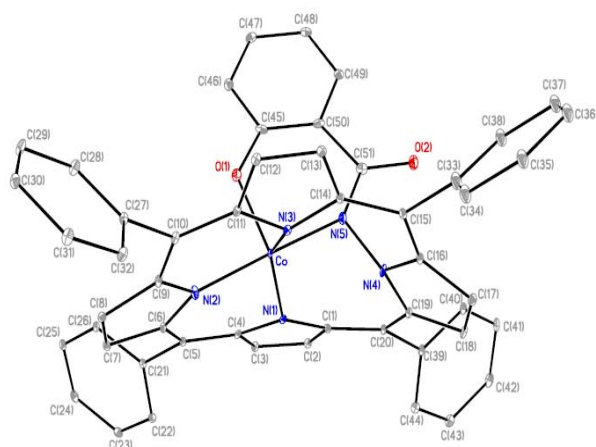

(b) 2

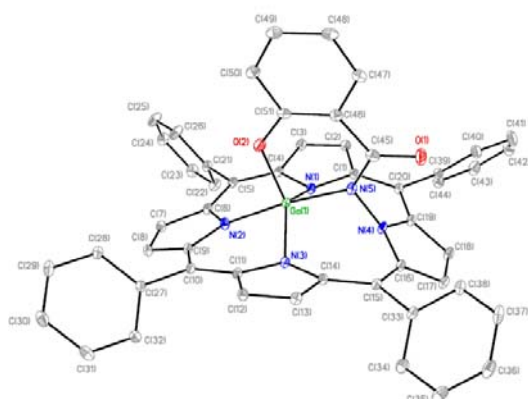

(c) 3

**Figure S2.** Molecular configuration and atom-labeling scheme for (a) **1** and (b)

Co(N-NCO(*o*-O)C<sub>6</sub>H<sub>4</sub>-tpp)) (**2**) and (c)

[Ga(N-NCO(*o*-O)C<sub>6</sub>H<sub>4</sub>-tpp) · 0.5CHCl<sub>3</sub>·MeOH; **3**·0.5CHCl<sub>3</sub>·MeOH], with

30% thermal ellipsoids. Hydrogen atoms, solvent CHCl<sub>3</sub> and MeOH for

**3**·0.5CHCl<sub>3</sub>·MeOH are omitted for clarity.

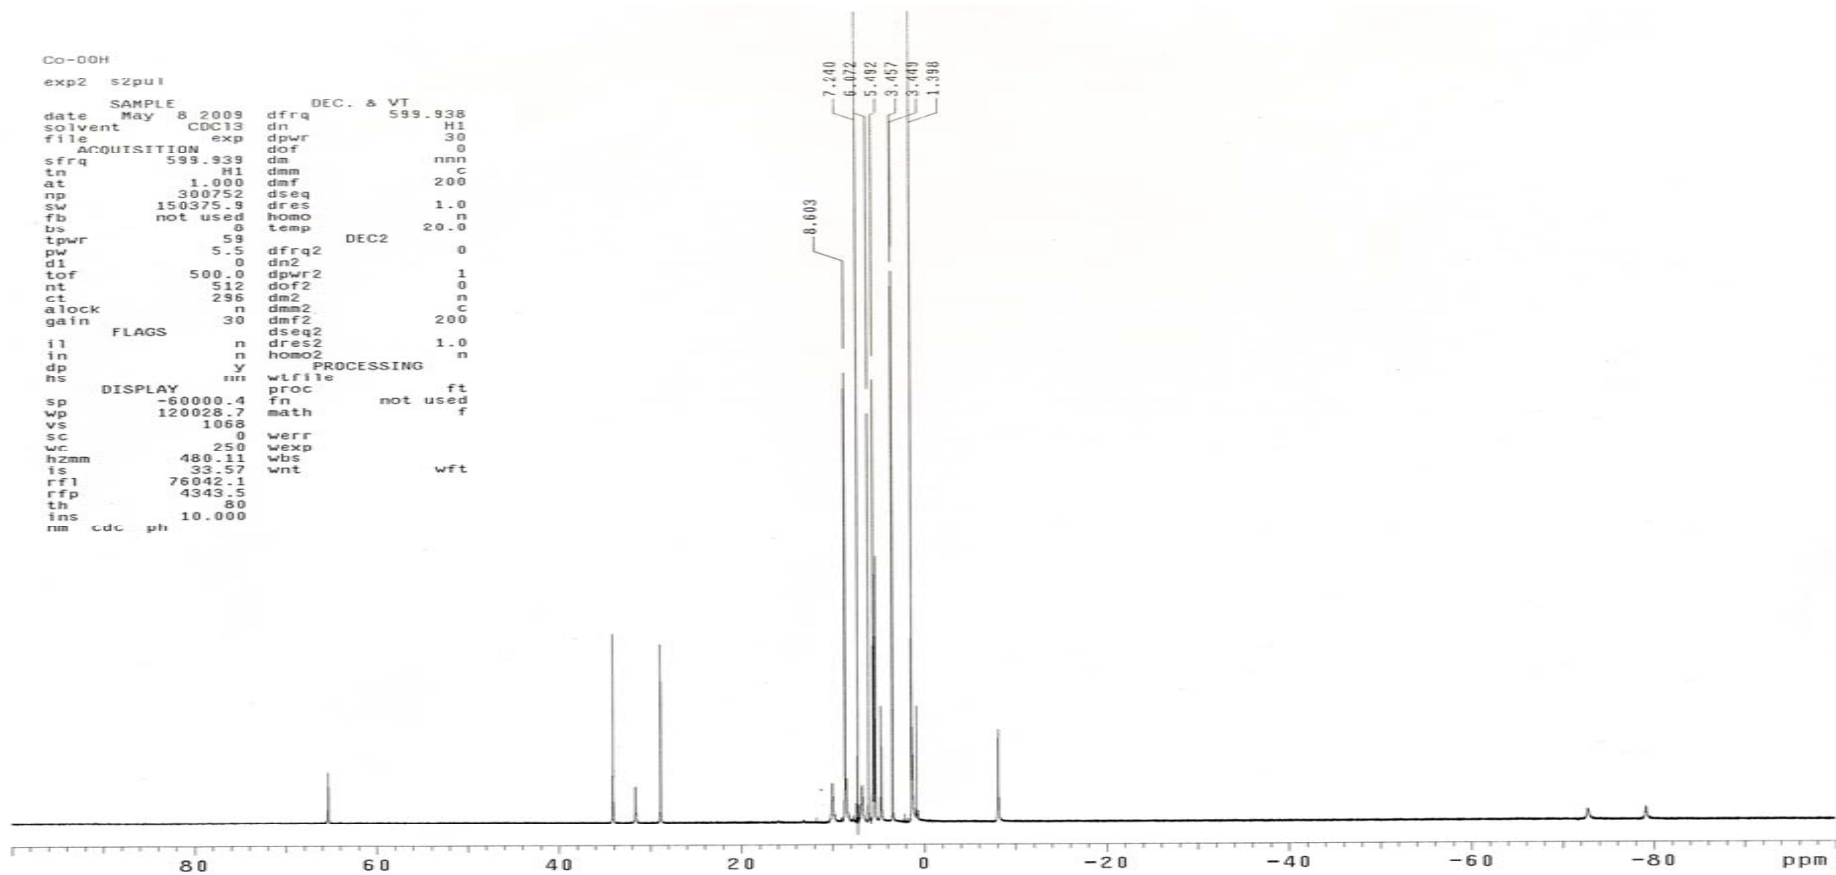

Figure S3.  $^1\text{H}$  NMR spectra for **2** at 599.95 MHz at 20°C in  $\text{CDCl}_3$ .

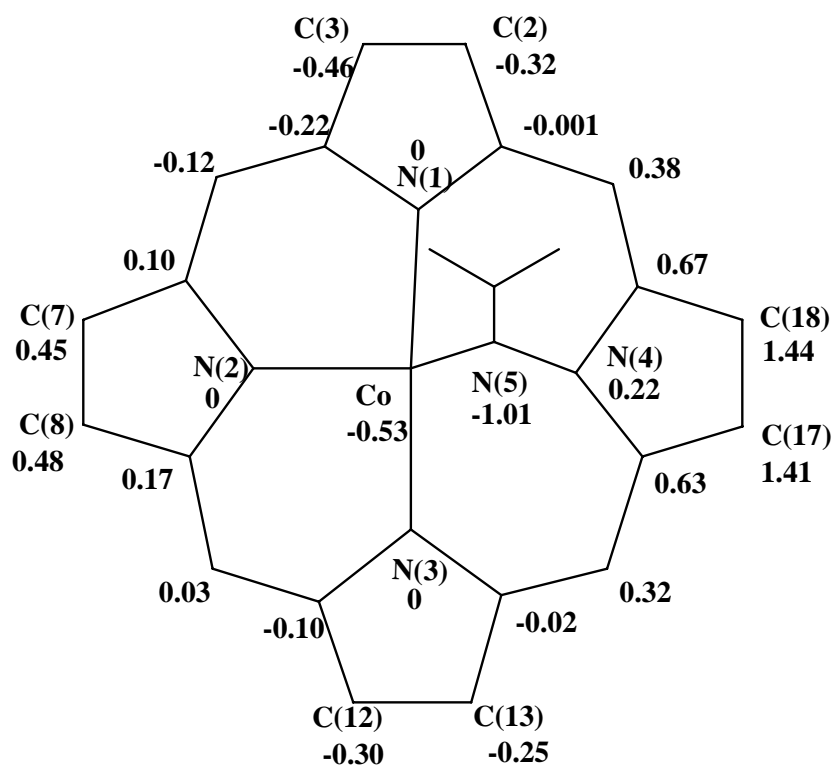

(a) 2

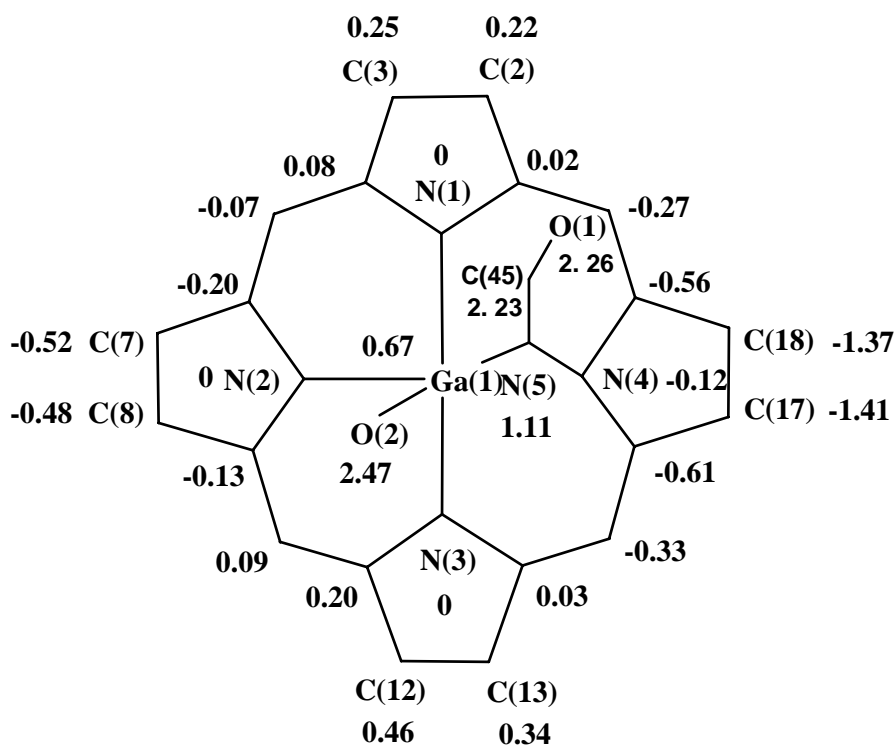

(b) 3

**Figure S4.** Diagram of the porphyrinato core ( $C_{20}N_4$ , M, and BA) of (a) compound **2** and (b) compound **3**. The values represent the displacement (in angstroms) of the atoms from the mean 3N plane [i.e. N(1)-N(3) for **2** and **3**].
